# Supplementary material
Source: MDPI journal article supplement (https://www.mdpi.com/2673-6772/4/2/10)
Supplement: s1 [file s1]

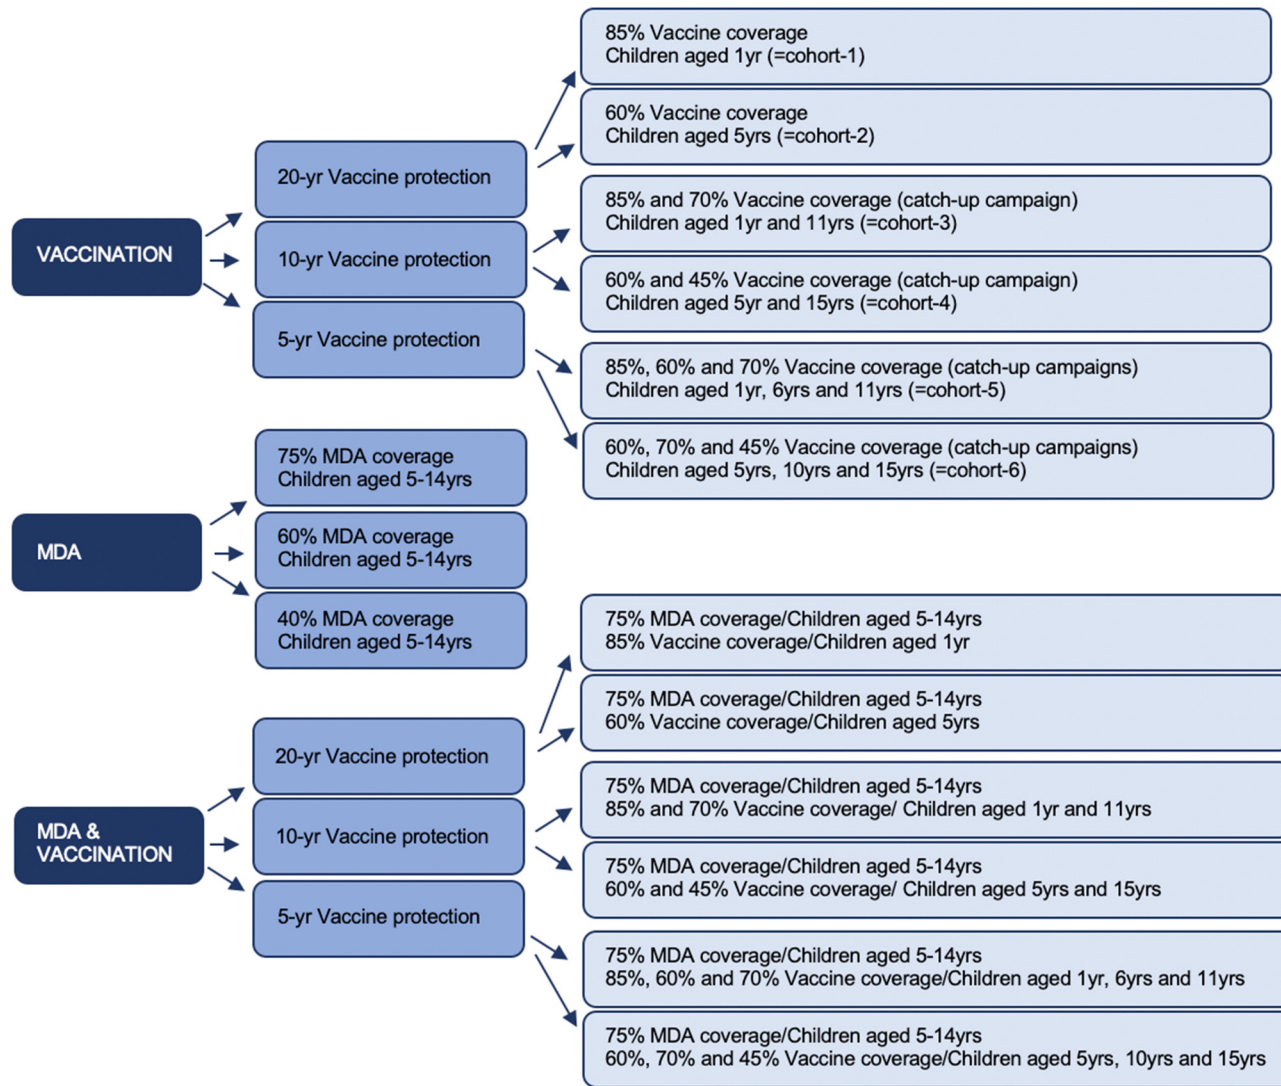

**Figure S1 Supplementary Material.** Simplified structure of the *Schistosoma mansoni* individual-based stochastic model illustrating interventions including coverage among targeted age categories

Model based on Kura *et al.* (2015) [130] applying mass drug administration, vaccination, and vaccination combined with mass drug administration (left). Model parameters (right) assuming 300 simulations over 15-year model duration among a presumed human host population  $N(a, t)$  of 500 with constant numbers of births and deaths consisting of  $N_V(a, t)$  vaccinated population and  $N_U(a, t)$  unvaccinated population.

Abbreviations: MDA=mass drug administration; yr=year; yrs=years; EPG=eggs per gram; S.=*Schistosoma*

|                       |                                                                                                                                                                                                                                                                                                                                                                                                                                                                                                                                                                                        |
|-----------------------|----------------------------------------------------------------------------------------------------------------------------------------------------------------------------------------------------------------------------------------------------------------------------------------------------------------------------------------------------------------------------------------------------------------------------------------------------------------------------------------------------------------------------------------------------------------------------------------|
| $N(a, t)$             | Total host population                                                                                                                                                                                                                                                                                                                                                                                                                                                                                                                                                                  |
| $N_V(a, t)$           | Vaccinated population                                                                                                                                                                                                                                                                                                                                                                                                                                                                                                                                                                  |
| $N_U(a, t)$           | Unvaccinated population                                                                                                                                                                                                                                                                                                                                                                                                                                                                                                                                                                |
| $a$                   | Host age [year]                                                                                                                                                                                                                                                                                                                                                                                                                                                                                                                                                                        |
| $t$                   | Time [year]                                                                                                                                                                                                                                                                                                                                                                                                                                                                                                                                                                            |
| $i$                   | Parasite establishment within host                                                                                                                                                                                                                                                                                                                                                                                                                                                                                                                                                     |
| $\mu(a)$              | Host mortality rate                                                                                                                                                                                                                                                                                                                                                                                                                                                                                                                                                                    |
| $q(a, t)$             | Population fraction vaccinated                                                                                                                                                                                                                                                                                                                                                                                                                                                                                                                                                         |
| $\omega$              | Vaccine decay rate as 1/duration of protection                                                                                                                                                                                                                                                                                                                                                                                                                                                                                                                                         |
| $\beta(a)$            | Effective contact rate leading to parasite survival and growth or <i>per capita</i> rate between two subjects per unit time <ul style="list-style-type: none"> <li>0.032 age-specific contact rate or infection rate in hosts aged <math>\leq 4</math>yrs</li> <li>0.162 age-specific contact rate or infection rate in hosts aged 5-9yrs</li> <li>1.000 age-specific contact rate or infection rate in hosts aged 10-15yrs</li> <li>0.006 age-specific contact rate or infection rate in hosts aged <math>\geq 16</math>yrs</li> </ul>                                                |
| $\sigma$              | 4-6 yrs (5.7 yrs) adult worm life expectancy within host impacting egg production                                                                                                                                                                                                                                                                                                                                                                                                                                                                                                      |
| $\lambda$             | 0.14 fecundity or rate of egg production per female per fecal sample assuming monogamous reproduction and density-dependent fecundity                                                                                                                                                                                                                                                                                                                                                                                                                                                  |
| $v_1$                 | Worm death rate of 0-1; impact of vaccine on worm death rate of 1                                                                                                                                                                                                                                                                                                                                                                                                                                                                                                                      |
| $v_2$                 | EPG feces rate of 0-1; impact of vaccine on EPG of 0                                                                                                                                                                                                                                                                                                                                                                                                                                                                                                                                   |
| $v_3$                 | Age-specific contact rate of 0-1; impact of vaccine on contact rates of 0                                                                                                                                                                                                                                                                                                                                                                                                                                                                                                              |
| $M(a, t)$             | Mean total worm burden in vaccinated and unvaccinated population                                                                                                                                                                                                                                                                                                                                                                                                                                                                                                                       |
| $M_u$                 | Mean worm burden in unvaccinated population                                                                                                                                                                                                                                                                                                                                                                                                                                                                                                                                            |
| $M_v$                 | Mean worm burden in vaccinated population                                                                                                                                                                                                                                                                                                                                                                                                                                                                                                                                              |
| Prevalence            | School-aged children % egg count threshold $>0$                                                                                                                                                                                                                                                                                                                                                                                                                                                                                                                                        |
| Heavy prevalence      | School-aged children % egg count threshold $>16$                                                                                                                                                                                                                                                                                                                                                                                                                                                                                                                                       |
| $L$                   | Environmental concentration of infectious material                                                                                                                                                                                                                                                                                                                                                                                                                                                                                                                                     |
| $\psi$                | Flow of infectious material into environment/reservoir                                                                                                                                                                                                                                                                                                                                                                                                                                                                                                                                 |
| $F(M(a, t); \lambda)$ | Egg output in dependence of female fecundity and the mean total worm burden in vaccinated and unvaccinated populations <ul style="list-style-type: none"> <li>0.032 environmental relative contribution of infectious stages in hosts aged <math>\leq 4</math>yrs</li> <li>0.162 environmental relative contribution of infectious stages in hosts aged 5-9yrs</li> <li>1.000 environmental relative contribution of infectious stages in hosts aged 10-15yrs</li> <li>0.006 environmental relative contribution of infectious stages in hosts aged <math>\geq 16</math>yrs</li> </ul> |
| $\rho(a)$             | Aggregation parameter (non-fixed depending on fluctuations in mean worm burden over time) <ul style="list-style-type: none"> <li>0.04 negative binomial host worm aggregation parameter low-risk setting</li> <li>0.24 negative binomial host worm aggregation parameter moderate- and high-risk settings</li> </ul>                                                                                                                                                                                                                                                                   |
| $k$                   | Average number of viable reproductive female offspring per female worm (parasite); secondary infectious subjects from infectious subject introduced in totally susceptible population (host) <ul style="list-style-type: none"> <li>1.7 basic reproductive number in low-risk setting with <math>&lt;10\%</math> prevalence</li> <li>1.8 basic reproductive number in moderate-risk setting with 10-50% prevalence</li> <li>3.2-5.0 basic reproductive number in high-risk setting with <math>&gt;50\%</math> prevalence</li> </ul>                                                    |
| Drug efficacy         | 86.3% <i>S. mansoni</i> ; 95% <i>S. japonicum</i> ; 94.1% <i>S. haematobium</i> (Anderson <i>et al.</i> , 2015)                                                                                                                                                                                                                                                                                                                                                                                                                                                                        |
| Vaccine efficacy      | 100%                                                                                                                                                                                                                                                                                                                                                                                                                                                                                                                                                                                   |
